# Supplementary material
Source: publisher figshare collection journal article supplement (https://acs.figshare.com/ndownloader/files/3740617)
Supplement: Supplementary file 1 [file 3740617]

## Supporting Information

# Anti-Galvanic Reduction of Silver Ion on Gold and Its Role in Anisotropic Growth of Gold Nanomaterials

Hosuk Kang,<sup>†,§</sup> Bong-Geun Kim,<sup>‡,§</sup> Hyon Bin Na,<sup>‡,\*</sup> and Seongpil Hwang<sup>†,\*</sup>

<sup>†</sup>Department of Advanced Material Chemistry, Korea University, Sejong 339-700, Republic of Korea

<sup>‡</sup>Department of Chemical Engineering, Myongji University, Yongin 449-728, Republic of Korea

\*Corresponding Authors

\*E-mail: hyonbin@mju.ac.kr, sphwang@korea.ac.kr

<sup>§</sup>These authors contributed equally to this work.

## Contents

Synthesis of anisotropic gold nanoparticles by controlling Ag deposition

Figure S1. Absorbance and fluorescent spectra of Au nanocrystals (AuNCs)

Figure S2. X-ray photoelectron spectroscopy (XPS) spectra of Ag treated AuNCs

Figure S3. Photographic images of AuNCs

Figure S4. Absorbance spectra of AuNCs in the presence of AgNO<sub>3</sub>

Figure S5. Absorbance spectra of AuNC dispersions after addition of AgNO<sub>3</sub> and ascorbic acid

Table S1. XPS Ag 3d fitting parameters and Auger parameters of Ag@Au NCs

### **Synthesis of anisotropic gold nanoparticles by controlling Ag deposition**

Anisotropic Au nanoparticles were synthesized by seed-mediated growth using BSPP-stabilized AuNC seeds and modified growth solutions. To synthesize Au nanoparticles of various shapes,  $\text{Ag}^+$  ion was differently introduced for each experiment.

*Synthesis of Au nanorods without silver ion (b):* A mixture of 0.5 ml of 10 mM  $\text{HAuCl}_4$ , 10 ml of 0.1 M CTAB, and 0.3 ml of DI water was prepared in a glass vial. After short-term incubation the color of mixture was changed to orange finally. At this point, 0.08 ml of 0.1 M ascorbic acid was added, and the mixture became transparent. Then, 24  $\mu\text{l}$  of 2  $\mu\text{M}$  BSPP-capped AuNC solution was added to the growth solution and further incubated for 3 h at 30 °C.

*Synthesis of multiple twinned Au stars with fairly developed tips using  $\text{Ag}^+$ -treated seed (c):* For the first time, 24  $\mu\text{l}$  of 2  $\mu\text{M}$  BSPP-capped AuNC solution was mixed with 0.1 ml of 10 mM  $\text{AgNO}_3$  followed by the incubation at RT for 1 hr. The growth solution was separately prepared by mixing following reagents in the order listed and then gentle mixing; 0.5 ml of 10 mM  $\text{HAuCl}_4$ , 10 ml of 0.1 M CTAB, 0.2 ml of DI water, and 0.08 ml of 0.1 M ascorbic acid. Then, the growth solution was mixed with pretreated seed and resulting solution was incubated for 3 h at 30 °C.

*Synthesis of twinned polyhedron Au nanoparticles using  $\text{Ag}^+$ -treated seed (d):* For the first time, 24  $\mu\text{l}$  of 2  $\mu\text{M}$  BSPP-capped AuNC solution was mixed with 0.01 ml of 10 mM  $\text{AgNO}_3$  and 0.09 ml of DI water followed by the incubation at RT for 1 hr. The growth solution was separately prepared by mixing following reagents in the order listed and then gentle mixing; 0.5 ml of 10 mM  $\text{HAuCl}_4$ , 10 ml of 0.1 M CTAB, 0.2 ml

of 0.5 M of  $\text{H}_2\text{SO}_4$ , and 0.08 ml of 0.1 M ascorbic acid. Then, the growth solution was mixed with pretreated seed and resulting solution incubated for 3 h at 30 °C.

*Synthesis of Au nanorods with the assistance of silver ion (e):* A mixture of 0.5 ml of 10 mM  $\text{HAuCl}_4$ , 0.02 ml of 10 mM  $\text{AgNO}_3$ , 10 ml of 0.1 M CTAB, and 0.08 ml of DI water was prepared in a glass vial. After short-term incubation the color of mixture changed to orange finally. At this point, 0.2 ml of 0.5 M  $\text{H}_2\text{SO}_4$  and 0.08 ml of 0.1 M ascorbic acid were added, and the growth solution became transparent. Then, 24  $\mu\text{l}$  of 2  $\mu\text{M}$  BSPP-capped AuNC solution was added to the growth solution and the mixture was further incubated for 3 h at 30 °C.

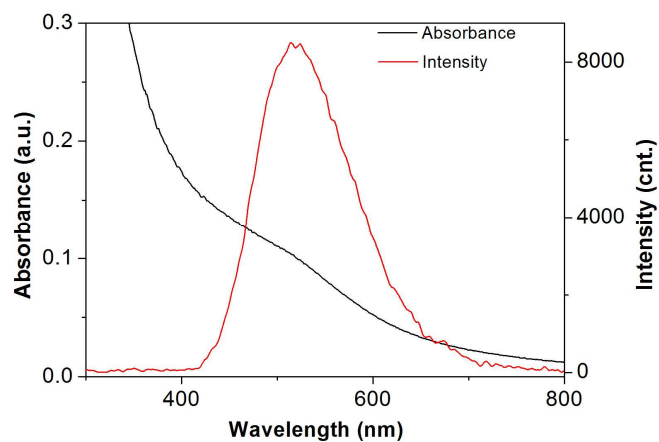

**Figure S1.** Absorbance and fluorescent spectra of Au nanocrystals (AuNCs)

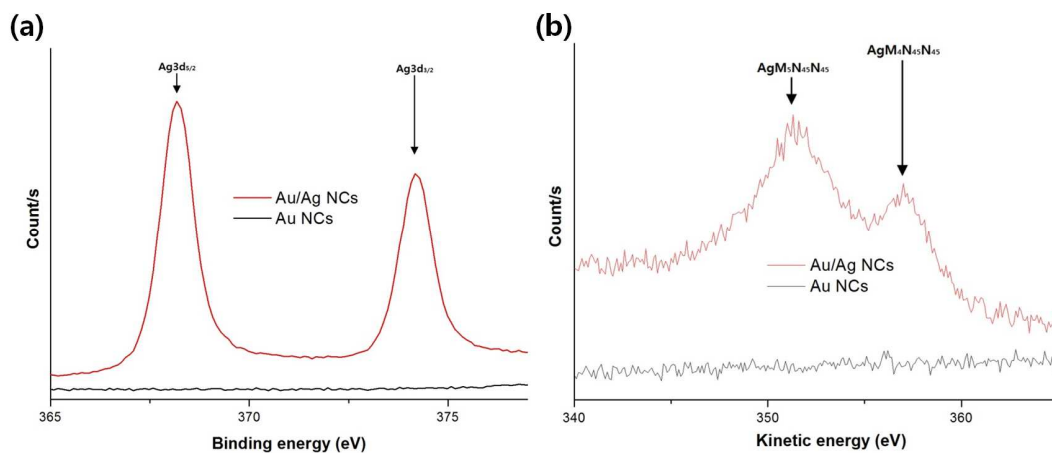

**Figure S2.** X-ray photoelectron spectroscopy (XPS) spectra of (a) Ag3d and (b) Ag MNN for AuNCs and 8 mM Ag-treated Au nanocrystals (Au/AgNCs).

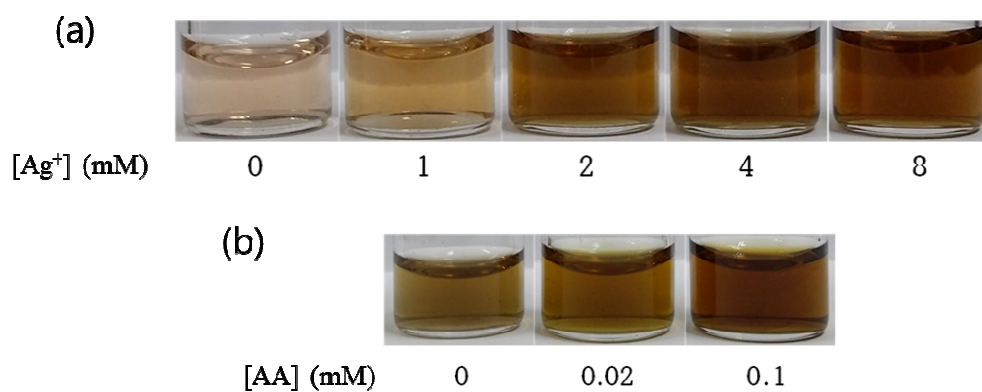

**Figure S3.** Photographic images of (a) AuNCs treated with different concentration of AgNO<sub>3</sub> and (b) AuNCs treated with fixed concentration of AgNO<sub>3</sub> (8 mM) and different concentration of ascorbic acid. NC dispersions were incubated with AgNO<sub>3</sub> in the dark for 1 h and 5 min, respectively.

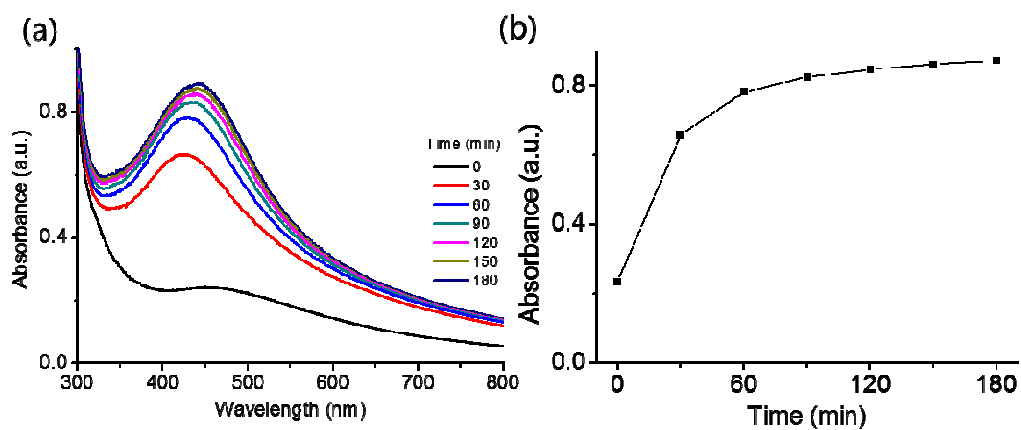

**Figure S4.** (a) Evolution of absorbance spectra of AuNCs in the presence of AgNO<sub>3</sub> (8 mM). (b) Absorbance at 427 nm as a function of time.

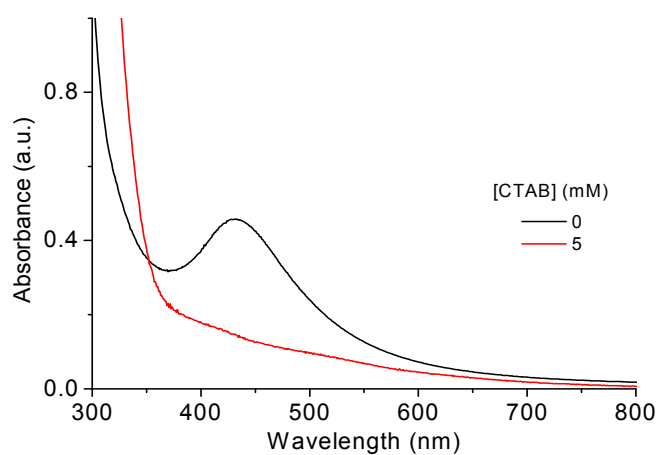

**Figure S5.** Absorbance spectra of AuNC dispersions after 5 min of the addition of AgNO<sub>3</sub> (1 mM) and ascorbic acid (0.1 mM) in absence and presence of CTAB (5 mM).

|                                                                       |        |
|-----------------------------------------------------------------------|--------|
| Binding energy (eV)                                                   |        |
| Ag 3d <sub>5/2</sub>                                                  | 368.18 |
| Ag 3d <sub>3/2</sub>                                                  | 374.18 |
| Auger parameter (AP, eV)                                              |        |
| AP-3d <sub>5/2</sub> , M <sub>4</sub> N <sub>45</sub> N <sub>45</sub> | 725.18 |
| AP-3d <sub>5/2</sub> , M <sub>5</sub> N <sub>45</sub> N <sub>45</sub> | 719.48 |

**Table S1.** XPS Ag 3d fitting parameters and Auger parameters of Ag/Au NCs
